1 **Vaccination for some childhood diseases may impact the outcome of covid-19 infections**

2 Irene Gobe<sup>1</sup>, Garesego F Koto<sup>1</sup>, Margaret Mokomane<sup>1</sup>, Kesaobaka Molebatsi<sup>2</sup>, Ishmael Kasvosve<sup>1</sup>,

3 Modisa S Motswaledi<sup>1\*</sup>

4 <sup>1</sup>Block 246 School of Allied Health Professions, University of Botswana, , Gaborone.

5 <sup>2</sup>Block 244I, Department of Statistics, University of Botswana, Gaborone.

6

**NOTE: This preprint reports new research that has not been certified by peer review and should not be used to guide clinical practice.**

7 **Abstract:**

8 **Background:** COVID-19 found the world in a state of unpreparedness. While research efforts to  
9 develop a vaccine are on-going, others have suggested the use of available vaccines to boost innate  
10 immunity.

11 **Objective:** We analysed three databases: UNICEF Immunization Coverage, Worldometer Corona  
12 Virus Updates and World Bank List of Economies to establish the association, if any, between  
13 vaccination for various diseases and COVID-19 death rates and recoveries across world economies.

14 **Results:** Mean percentage death rates were lower in countries that vaccinated for Hepatitis-B birth  
15 dose (2.53% vs 3.79%,  $p = 0.001$ ), Bacille Calmette-Guérin Vaccine (2.93% vs 5.10%,  $p = 0.025$ ) and  
16 Inactivated Polio Vaccine 1<sup>st</sup> dose (2.8% vs 4.01%,  $p = 0.022$ ) than those which did not report  
17 vaccination. In high income countries, a significant negative correlation with death rates was  
18 observed with vaccination for Measles-containing vaccine 2<sup>nd</sup> dose ( $r = -0.290$ ,  $p = 0.032$ ), Rubella-  
19 containing vaccine 1<sup>st</sup> dose ( $r = -0.325$ ,  $p = 0.015$ ), Hepatitis B 3<sup>rd</sup> dose ( $r = -0.562$ ,  $p = 3.3 \times 10^{-5}$ ),  
20 Inactivated Polio vaccine 1<sup>st</sup> dose ( $r = -0.720$ ,  $p = 0.008$ ). Inactivated Polio Vaccine 1st dose and  
21 Measles-containing vaccine 2<sup>nd</sup> dose also correlated with better recoveries. In Low Income countries,  
22 only Rubella-containing vaccine correlated with lower deaths while Yellow fever vaccine was  
23 associated with poorer recoveries.

24 **Conclusion:** Our analysis corroborates the potential benefit of vaccination and warrant further  
25 research to explore the rationale for repurposing other vaccines to fight COVID-19.

26

27 **Key Words:** COVID-19, Percent death rate, percent recovery, vaccine coverage,

28

29

## 30 Introduction

31 A number of recent publications have raised conversations regarding the potential benefits of BCG  
32 vaccine in mitigating the adverse effects of SARS COV-2 infection(1, 2). Such hypotheses were inspired  
33 by past reports where BCG vaccination was observed to have benefits beyond prevention of  
34 tuberculosis alone. These included protection against some viral infections(3) as well as overall  
35 reduction in childhood mortality occasioned by other infectious agents(4). A recent publication based  
36 on country policies reported that countries with a long history of BCG vaccination experienced lower  
37 numbers of SARS COV-2 infections and fewer deaths(1). Another study found a strong correlation  
38 between the BCG index and reduced COVID-19 mortalities in European countries (5).

39 While most vaccines confer immunity through antigen-specific immune responses, some reports  
40 suggest that vaccination against one disease may confer protection against another, as evidenced in  
41 the upregulation of a wide range of innate immune responses to BCG vaccine(6). This phenomenon is  
42 attributed to the development of “trained” immunity, in which BCG-activated monocytes are primed  
43 to produce more cytokines such as IL-1 $\beta$ , IL-6, IFN- $\gamma$  and TNF(2).

44 In fact, other investigators have reported increased expression of pathogen-associated molecular  
45 patterns on cells of monocytic origin up to one year after exposure to BCG, enabling a more robust  
46 induction of TH1/Th17 responses(7). BCG vaccination was also noted to enhance production of such  
47 cytokines as IFN- $\gamma$ , IL-2 and IL-12, which are important for potentiation of cell mediated immunity(8).  
48 The above notwithstanding, other investigators have cast doubt on the potential benefits of BCG  
49 vaccination in the fight against COVID-19(9).

50 The afore-mentioned discussions have inevitably culminated on the debate to consider the potential  
51 prophylactic use of BCG against COVID-19(10), with some data corroborating the anti-COVID-19  
52 effect(11). In the current report, we analysed global vaccination coverage and global COVID-19 data  
53 to determine if any association existed between the degree of vaccine coverage and the death rates  
54 attributed to COVID-19, as well as recovery rates.

55 **Methods:**

56 We studied global vaccination coverages as reported by UNICEF(12) and compared them to COVID-19  
57 deaths and recoveries across the world as reported on the Worldometer(13). These vaccines included  
58 the measles-containing-vaccine first dose (MCV1), measles-containing vaccine second dose (MCV2),  
59 Pneumococcal Conjugate Vaccine – 3<sup>rd</sup> Dose (PCV3), Rubella-containing vaccine first dose (RCV1),  
60 Rotavirus-containing vaccine, (RotaCV), Diphtheria and tetanus toxoid and pertussis-containing  
61 vaccine (DTP3), Hepatitis B vaccine – Birth dose (HepB\_BD), Hepatitis B third dose (HepB3),  
62 *Haemophilus influenzae* type b-containing vaccine (HibV), Bacille Calmette-Guérin Vaccine (BCG),  
63 inactivated Polio virus vaccine (IPV) and Yellow fever vaccine (YFV).

64 The death rate for each country was computed as the total number of deaths per million divided by  
65 the total number of confirmed cases per million, expressed as a percentage. The independent samples  
66 t-test was used to compare the mean percentage of COVID-19 deaths between countries that  
67 reported vaccinations and those which did not, using data extracted on the 3<sup>rd</sup> August 2020 from the  
68 COVID-19 Worldometer. Death and recovery data were available for 168 and 175 countries,  
69 respectively. However, some vaccination data was missing for some countries and this resulted in  
70 different sample sizes as reflected in the analyses. Mean vaccination coverages were correlated with  
71 recovery and death rates where such vaccination data was available. Otherwise we compared country  
72 death rates and recoveries according to categories of whether vaccine data was reported or not. Data  
73 was also disaggregated according to the World Bank economic classification (June 2020)(14).

74 **Results**

75 The mean death rate ( $\pm$ sd) from COVID-19 for 168 countries was  $3.2\pm 3.5\%$  with a range of 0.06-29.3%,  
76 while the mean recovery rate for 175 countries was  $68.2\pm 22.3\%$ . Recoveries ranged from 8-100%. The  
77 results showing a comparison of mean COVID-19 death rates between vaccinating and non-  
78 vaccinating countries is shown in Table 1. Only Hepatitis B-BD, BCG and IPV ( $p= 0.01$ ,  $p=0.025$  and  
79  $p=0.022$ , respectively) showed significant differences in mean COVID-19 death rates across vaccinating

80 and non-vaccinating countries, with vaccinating countries showing significantly lower death rates.  
81 Other vaccines did not yield significant differences between vaccinating and non-vaccinating  
82 countries.

83 **Table 1:** Comparison of Covid-19 death rates in countries vaccinating or not vaccinating for certain  
84 diseases

| Vaccine name* | Vaccinating Countries |                            | Non-Vaccinating Countries |                         | Two-tailed significance |
|---------------|-----------------------|----------------------------|---------------------------|-------------------------|-------------------------|
|               | N                     | COVID-19 Death Rate (%±SD) | N                         | COVID-19 Death Rate (%) |                         |
| MCV2          | 144                   | 3.38±3.66                  | 24                        | 2.40±2.11               | 0.217                   |
| PCV3          | 130                   | 3.43±3.82                  | 38                        | 2.60±1.87               | 0.191                   |
| RCV1          | 143                   | 3.34±3.67                  | 25                        | 2.67±2.17               | 0.360                   |
| RotaCV        | 92                    | 3.29±3.95                  | 76                        | 3.20±2.87               | 0.857                   |
| HepB_BDV      | 72                    | 2.53±1.81                  | 96                        | 3.79±4.28               | 0.010                   |
| HepB3V        | 160                   | 3.11±3.34                  | 8                         | 6.09±5.22               | 0.153                   |
| BCG           | 143                   | 2.93±3.23                  | 25                        | 5.10±4.4                | 0.025                   |
| YFV           | 36                    | 2.88±2.06                  | 132                       | 3.35±3.35               | 0.478                   |
| IPV1          | 113                   | 2.81±3.38                  | 55                        | 4.1±3.56                | 0.022                   |

85 \* MCV2: Measles containing vaccine 2<sup>nd</sup> dose, PCV3: Pneumococcal Conjugate vaccine 3<sup>rd</sup> dose, RCV1:  
86 Rubella-containing vaccine 1<sup>st</sup> dose, RotaCV: Rotavirus-containing vaccine, HepB-BD: Hepatitis B birth  
87 dose, HepB3V: Hepatitis B 3<sup>rd</sup> dose, BCG: Bacille Calmette-Guérin Vaccine, YFV: Yellow fever vaccine,  
88 IPV1: Inactivated Polio vaccine 1<sup>st</sup> dose.

89 Correlation of the aggregated data showed that the following vaccines were weakly associated with  
90 lower COVID-19 death rates: Rubella-containing virus (R= -0.191, p=0.022), Hepatitis B3 (r= -0.201,  
91 p=0.011) and BCG (r= -0.221, p= 0.008). None of the vaccines were associated with increased COVID-  
92 19-related death. The correlation between the number of years that any country was vaccinating for

93 the diseases and death rates was only significant for IPV1 in high-income countries ( $r = -0.620$ ,  $p =$   
94  $0.042$ ).

95 We observed that the percentage of recoveries was higher in non-vaccinating countries for the  
96 diseases shown in Table 2.

97 Table 2: Vaccines that show significant differences in mean percent Covid-19 recoveries.

| <b>Vaccine*</b> | <b>No. countries</b> | <b>Recovery</b> | <b>No. countries not</b> | <b>Recovery</b> | <b>Two-tailed</b>   |
|-----------------|----------------------|-----------------|--------------------------|-----------------|---------------------|
| <b>Name</b>     | <b>Vaccinating</b>   | <b>%±SD</b>     | <b>Vaccinating</b>       | <b>%±SD</b>     | <b>significance</b> |
| PCV3            | 131                  | 65.6±22.7       | 44                       | 76.0±18.9       | 0.007               |
| RotaC           | 93                   | 63.8±23         | 82                       | 73.1±18.9       | 0.005               |
| HepB3           | 168                  | 67.4±22.3       | 7                        | 86.1±9.7        | 0.001               |
| YFV             | 36                   | 61.7±20.4       | 139                      | 69.9±22.5       | 0.050               |

98 \*PCV3: Pneumococcal Conjugate vaccine, RotaC: Rotavirus-containing vaccine, HepB3: Hepatitis B 3<sup>rd</sup>  
99 dose, YFV: Yellow Fever vaccine

100 We also compared percent death and recovery rates according to income level of the countries. The  
101 results, summarized in Table 3, show a clear correlation of some vaccines coverages with lower death  
102 rates. Only Pol-3 correlated with a significant unfavourable outcome in high income countries. RCV-1  
103 showed similar favourable outcomes in both high- and medium-income countries. IPV strongly  
104 correlated with lower death rates in high income countries and higher recoveries in upper middle-  
105 income countries, while YFV showed negative correlation with percent recovery.

106

107 Table 3: Correlation of average vaccine coverages with death and recovery rates according to World  
 108 Bank Income-based classification  
 109

| <b>World Bank</b> |                | <b>% Death Rate</b>    |                        |                | <b>Recovery (%)</b>    |                        |                |
|-------------------|----------------|------------------------|------------------------|----------------|------------------------|------------------------|----------------|
| <b>Income</b>     |                |                        |                        |                |                        |                        |                |
| <b>Level</b>      |                |                        |                        |                |                        |                        |                |
| <b>High</b>       | <b>Vaccine</b> | <b>No of Countries</b> | <b>Coefficient (r)</b> | <b>P-value</b> | <b>No of countries</b> | <b>Coefficient (r)</b> | <b>P-value</b> |
|                   | MCV2           | 55                     | -0.290                 | 0.032          | 53                     | 0.271                  | 0.050          |
|                   | Pol3           | 56                     | +0.287                 | 0.032          | -                      | -                      | -              |
|                   | RCV1           | 56                     | -0.325                 | 0.015          | -                      | -                      | -              |
|                   | HepB3          | 48                     | -0.562                 | 0.000033       | -                      | -                      | -              |
|                   | IPV1           | 12                     | -0.720                 | 0.008          | 14                     | 0.747                  | 0.002          |
| <b>Upper</b>      | IPV1           | -                      | -                      | -              | 41                     | 0.358                  | 0.021          |
| <b>Middle</b>     |                |                        |                        |                |                        |                        |                |
| <b>Lower</b>      | -              | -                      | -                      | -              | -                      | -                      | -              |
| <b>Middle</b>     |                |                        |                        |                |                        |                        |                |
| <b>Low</b>        | RCV1           | 13                     | -0.567                 | 0.043          |                        |                        |                |
|                   | YFV            | -                      | -                      | -              | 12                     | -0.578                 | 0.049          |

110 MCV2: Measles containing vaccine 2<sup>nd</sup> dose, Pol3: Polio vaccine 3<sup>rd</sup> dose, HepB3V: Hepatitis B 3<sup>rd</sup> dose,  
 111 IPV1: Inactivated Polio vaccine 1<sup>st</sup> dose, RCV1: Rubella-containing vaccine 1<sup>st</sup> dose, YFV: Yellow fever  
 112 vaccine.

113  
 114  
 115

## 116 Discussion

117 We undertook an analysis of COVID-19 deaths and recoveries in light of immunization with various  
118 vaccines to determine the association, if any, of vaccination in mitigating the adverse outcomes of  
119 infection with the SARS CoV-2 virus. Vaccination with Hepatitis B birth dose, BCG and inactivated Polio  
120 vaccine were associated with lower Covid-19 deaths. This is consistent with other reports where BCG  
121 vaccination was associated with lower mortalities and severity of the disease(1, 5). We also observed  
122 a weak but significant correlation suggesting that COVID-19 deaths are generally lower in countries  
123 where vaccination for BCG, Rubella-containing vaccines and Hepatitis B 3<sup>rd</sup> dose are given. Moreover,  
124 we observed that vaccine coverage, rather than the longevity of use, has a better correlation with  
125 percent deaths attributed to COVID-19.

126 We note that death or recovery is also a function of the effectiveness of the health care system in any  
127 country. We presumed that higher income countries would generally afford better health care  
128 systems and therefore better recoveries and lower deaths.

129  
130 Paradoxically, percent recoveries were significantly higher in non-vaccinating countries for  
131 Pneumococcal Conjugate vaccine (PCV), RotaCV and Hepatitis B-3 vaccines. We hypothesize that if  
132 vaccines, as has been established, promote innate immunity (4, 7, 15, 16), then both death rates and  
133 recoveries should be expected to be favourable in vaccinated individuals. However, since recovery  
134 includes individuals who must have been hospitalized for symptomatic presentation or those who  
135 tested positive but never needed to recover since they were asymptomatic, those with competent  
136 immune systems would not be expected to be hospitalized, and would therefore be under-  
137 represented among documented recoveries. We propose that this under-representation may account  
138 for the higher recoveries in non-vaccinating countries for the specified vaccines.

139  
140 There is evidence suggesting that vaccination against tuberculosis, and other vaccinations presented  
141 in this work, could provide protection or ameliorate the severity of COVID-19 deaths. Given the gravity



142 of the current COVID-19 threat and the relative unpreparedness of most developing countries, we  
143 strongly recommend coordinated clinical trials on vaccination or revaccination as an additional  
144 strategy to mitigate the effects of COVID-19. This may imply carrying out clinical trials in designated  
145 areas, especially in countries such as Botswana, where the pandemic is still evolving.

146

#### 147 **Study limitations**

148

149 Our study has several limitations. There could be confounding factors in our data that affect both  
150 vaccination coverage and COVID-19 deaths such as genetic diversity, age of population, prevalence of  
151 comorbidities, global traveling, population density and quality of health care services. While we did  
152 not test for causal effects of vaccination coverage on COVID-19 death rates, we observe that our  
153 findings corroborate earlier reports on the potential of other vaccines in mitigating the deleterious  
154 effects of COVID-19.

155 Another potential limitation is the fact that the disease is still developing in many countries, so the  
156 true resilience of many countries is still to be tested. It is also not clear how to interpret lower  
157 recoveries especially in view of the different definitions of recovery. In Botswana, for example,  
158 recovery was initially defined in the context of two successive nucleic acid tests at least twenty four  
159 hours apart. The current definition now relies on the clinical manifestations and age of the infection.  
160 Nevertheless, the data seems to corroborate reports alluding to potential benefit of BCG of some  
161 vaccines against COVID-19.

162

#### 163 **Competing Interests**

164 The authors declare that there are no competing interests in this study.

#### 165 **Funding:**

166 The authors confirm that the study did not require any funds.

167 Data availability

168 The data used in this analysis is available as a public resource from UNICEF, World Bank and  
169 Worldometer databases.

170 **References:**

- 171 1. Miller A, Reandelar MJ, Fasciglione K, Roumenova V, Li Y, Otazu GH. Correlation between  
172 universal BCG vaccination policy and reduced morbidity and mortality for COVID-19: an  
173 epidemiological study. MedRxiv. 2020.
- 174 2. Redelman-Sidi G. Could BCG be used to protect against COVID-19? Nature Reviews Urology.  
175 2020;17(6):316-7.
- 176 3. Moorlag S, Arts RJ, van Crevel R, Netea MG. Non-specific effects of BCG vaccine on viral  
177 infections. Clinical Microbiology and Infection. 2019;25(12):1473-8.
- 178 4. Shann F. The non-specific effects of vaccines. Archives of disease in childhood. 2010;95(9):662-  
179 7.
- 180 5. Escobar LE, Molina-Cruz A, Barillas-Mury C. BCG vaccine protection from severe coronavirus  
181 disease 2019 (COVID-19). Proceedings of the National Academy of Sciences.  
182 2020;117(30):17720-6.
- 183 6. Arts RJW, Moorlag S, Novakovic B, Li Y, Wang SY, Oosting M, et al. BCG Vaccination Protects  
184 against Experimental Viral Infection in Humans through the Induction of Cytokines Associated  
185 with Trained Immunity. Cell Host Microbe. 2018;23(1):89-100.e5.
- 186 7. Kleinnijenhuis J, Quintin J, Preijers F, Benn CS, Joosten LA, Jacobs C, et al. Long-lasting effects of  
187 BCG vaccination on both heterologous Th1/Th17 responses and innate trained immunity.  
188 Journal of innate immunity. 2014;6(2):152-8.
- 189 8. Griffin DE. The Immune Response in Measles: Virus Control, Clearance and Protective Immunity.  
190 Viruses. 2016;8(10):282.
- 191 9. Singh S. BCG vaccines may not reduce COVID-19 mortality rates. medRxiv.  
192 2020:2020.04.11.20062232.
- 193 10. Curtis N, Sparrow A, Ghebreyesus TA, Netea MG. Considering BCG vaccination to reduce the  
194 impact of COVID-19. The Lancet. 2020;395(10236):1545-6.
- 195 11. Hegarty PK, Kamat AM, Zafirakis H, Dinardo A. BCG vaccination may be protective against Covid-  
196 19. preprint. 2020.
- 197 12. World Health Organization. Immunization-coverage-by-antigen-country-regional-and-global-  
198 trends-WUENIC-2019revision [Internet]. 20219 [cited 03 August 2020]. Available from:  
199 <https://data.unicef.org/topic/child-health/immunization/>.
- 200 13. Worldometer: Corona Virus updates [Internet]. 2020 [cited 03 August 2020]. Available from:  
201 <https://www.worldometers.info/>.
- 202 14. World Bank. World Bank list of economies (June 2020). 2020.
- 203 15. Stensballe LG, Nante E, Jensen IP, Kofoed P-E, Poulsen A, Jensen H, et al. Acute lower  
204 respiratory tract infections and respiratory syncytial virus in infants in Guinea-Bissau: a  
205 beneficial effect of BCG vaccination for girls: community based case-control study. Vaccine.  
206 2005;23(10):1251-7.
- 207 16. Higgins JP, Soares-Weiser K, López-López JA, Kakourou A, Chaplin K, Christensen H, et al.  
208 Association of BCG, DTP, and measles containing vaccines with childhood mortality: systematic  
209 review. bmj. 2016;355.

210
